# Supplementary material
Source: PubMed Central journal article supplement (PMC3337181)
Supplement: psb-6-1932-s1.pdf [file psb-6-1932-s1.pdf]

Supplementary Table S1. The list of phytohormone biosynthetic genes examined in this study

**GA**

| gene name            | OsID         | probe on 44K array |
|----------------------|--------------|--------------------|
| <i>OsCPS</i>         | Os02g0278700 | Entry              |
| <i>OsKS</i>          | Os04g0611800 | Entry              |
| <i>OsKO2</i>         | Os06g0569900 | Entry              |
| <i>OsKAO</i>         | Os06g0110000 | Entry              |
| <i>OsGA20ox1</i>     | Os03g0856700 | Entry              |
| <i>OsGA20ox2/SD1</i> | Os01g0883800 | Entry              |
| <i>OsGA20ox3</i>     | Os07g0169700 | Entry              |
| <i>OsGA20ox4</i>     | Os05g0421900 | Entry              |
| <i>OsGA3ox2/D18</i>  | Os01g0177400 | Entry              |
| <i>EUI</i>           | Os05g0482400 | Entry              |
| <i>OsGA2ox1</i>      | Os05g0158600 | Entry              |
| <i>OsGA2ox2</i>      | Os01g0332200 | Entry              |
| <i>OsGA2ox3</i>      | Os01g0757200 | Entry              |
| <i>OsGA2ox4</i>      | Os05g0514600 | Entry              |
| <i>OsGA2ox5</i>      | Os07g0103500 | Entry              |
| <i>OsGA2ox6</i>      | Os04g0522500 | Entry              |
| <i>OsGA2ox7</i>      | Os01g0209700 | Entry              |
| <i>OsGA2ox8*</i>     | Os05g0560900 | Entry              |
| <i>OsGA2ox9*</i>     | Os02g0630300 | Entry              |
| <i>OsGA2ox10*</i>    | Os05g0208500 | No entry           |

**Auxin**

| gene name       | OsID         | probe on 44K array |
|-----------------|--------------|--------------------|
| <i>OsASA1</i>   | Os03g0826500 | Entry              |
| <i>OsASA2</i>   | Os03g0264400 | Entry              |
| <i>OsASB1</i>   | Os04g0463500 | Entry              |
| <i>OsASB2</i>   | Os03g0718000 | Entry              |
| <i>OsTAA1;1</i> | Os01g0169800 | Entry              |
| <i>OsTAA1;2</i> | Os01g0717400 | Entry              |
| <i>OsTAA1;3</i> | Os01g0717700 | Entry              |
| <i>OsTAA1;4</i> | Os05g0169300 | Entry              |
| <i>OsAAO1</i>   | Os10g0138100 | Entry              |
| <i>OsAAO2</i>   | Os03g0790900 | Entry              |
| <i>OsAAO3</i>   | Os07g0281700 | Entry              |
| <i>OsYUC1</i>   | Os01g0645400 | Entry              |
| <i>OsYUC2</i>   | Os05g0528600 | No entry           |
| <i>OsYUC3</i>   | Os01g0732600 | No entry           |
| <i>OsYUC4</i>   | Os01g0224700 | Entry              |
| <i>OsYUC5</i>   | Os12g0512000 | Entry              |
| <i>OsYUC6</i>   | Os07g0437000 | Entry              |
| <i>OsYUC7</i>   | Os04g0128900 | Entry              |
| <i>COW1</i>     | Os03g0162000 | Entry              |

|               |              |       |
|---------------|--------------|-------|
| <i>OsNIT1</i> | Os02g0635200 | Entry |
| <i>OsNIT2</i> | Os02g0635000 | Entry |

### CK

| gene name          | OsID         | probe on 44K array |
|--------------------|--------------|--------------------|
| <i>OsIPT1</i>      | Os03g0358900 | No entry           |
| <i>OsIPT2</i>      | Os03g0356900 | Entry              |
| <i>OsIPT3</i>      | Os05g0312000 | Entry              |
| <i>OsIPT4</i>      | Os03g0810100 | Entry              |
| <i>OsIPT5</i>      | Os07g0211700 | No entry           |
| <i>OsIPT6</i>      | Os07g0190033 | No entry           |
| <i>OsIPT7</i>      | Os05g0551700 | Entry              |
| <i>OsIPT8</i>      | Os01g0688300 | No entry           |
| <i>OsCYP735A3</i>  | Os08g0429800 | No entry           |
| <i>OsCYP735A4</i>  | Os09g0403300 | No entry           |
| <i>LOG</i>         | Os01g0588900 | Entry              |
| <i>OsCKX1</i>      | Os01g0187600 | Entry              |
| <i>OsCKX2/Gn1a</i> | Os01g0197600 | Entry              |
| <i>OsCKX3</i>      | Os10g0483500 | Entry              |
| <i>OsCKX4</i>      | Os01g0940000 | Entry              |
| <i>OsCKX5</i>      | Os01g0775400 | Entry              |
| <i>OsCKX6</i>      | Os02g0220000 | No entry           |
| <i>OsCKX7</i>      | Os02g0220100 | No entry           |
| <i>OsCKX8</i>      | Os04g0523500 | No entry           |
| <i>OsCKX9</i>      | Os05g0374200 | Entry              |
| <i>OsCKX10</i>     | Os06g0572300 | No entry           |
| <i>OsCKX11</i>     | Os08g0460600 | Entry              |

### BR

| gene name           | OsID         | probe on 44K array |
|---------------------|--------------|--------------------|
| <i>OsSMT1</i>       | Os07g0206700 | Entry              |
| <i>OsFACKEL1</i>    | Os01g0354200 | Entry              |
| <i>OsFACKEL2</i>    | Os09g0565600 | Entry              |
| <i>OsHYD1</i>       | Os01g0103600 | Entry              |
| <i>OsDWF7</i>       | Os01g0134500 | Entry              |
| <i>OsDRF5</i>       | Os02g0465400 | Entry              |
| <i>OsDIM</i>        | Os10g0397400 | Entry              |
| <i>OsDET1;1</i>     | Os11g0184100 | Entry              |
| <i>OsDET1;2</i>     | Os01g0851600 | Entry              |
| <i>OsDWARF4</i>     | Os03g0227700 | Entry              |
| <i>CYP724B1/D11</i> | Os04g0469800 | Entry              |
| <i>CYP90D2/D2</i>   | Os01g0197100 | Entry              |
| <i>OsCPD1</i>       | Os11g0143200 | Entry              |
| <i>OsCPD2</i>       | Os12g0139300 | Entry              |
| <i>OsDWARF</i>      | Os03g0602300 | Entry              |

|                 |              |       |
|-----------------|--------------|-------|
| <i>OsBAS1L1</i> | Os06g0600400 | Entry |
| <i>OsBAS1L2</i> | Os01g0388000 | Entry |
| <i>OsBAS1L3</i> | Os02g0204700 | Entry |

### Ethylene

| gene name      | OsID         | probe on 44K array |
|----------------|--------------|--------------------|
| <i>OsSAM1*</i> | Os01g0293000 | Entry              |
| <i>OsSAM2*</i> | Os05g0135700 | Entry              |
| <i>OsACS1</i>  | Os03g0727600 | Entry              |
| <i>OsACS2</i>  | Os04g0578000 | Entry              |
| <i>OsACS3</i>  | Os05g0196600 | No entry           |
| <i>OsACS4</i>  | Os05g0319200 | No entry           |
| <i>OsACS5</i>  | Os01g0192900 | Entry              |
| <i>OsACS6</i>  | Os06g0130400 | Entry              |
| <i>OsACO1</i>  | Os09g0451400 | Entry              |
| <i>OsACO2</i>  | Os02g0771600 | Entry              |
| <i>OsACO3</i>  | Os09g0451000 | Entry              |
| <i>OsACO4</i>  | Os11g0186900 | Entry              |
| <i>OsACO5</i>  | Os05g0149400 | Entry              |
| <i>OsACO6</i>  | Os05g0149300 | Entry              |
| <i>OsACO7</i>  | Os01g0580500 | Entry              |

### ABA

| gene name            | OsID         | probe on 44K array |
|----------------------|--------------|--------------------|
| <i>OsZEP1</i>        | Os04g0448900 | Entry              |
| <i>OsABA4</i>        | Os01g0128300 | Entry              |
| <i>OsNECD1</i>       | Os03g0645900 | Entry              |
| <i>OsNECD2</i>       | Os12g0617400 | Entry              |
| <i>OsNCED3</i>       | Os07g0154100 | Entry              |
| <i>OsSDR1/OsABA2</i> | Os03g0810800 | Entry              |
| <i>OsSDR2</i>        | Os03g0833100 | Entry              |
| <i>OsSDR3</i>        | Os03g0299200 | Entry              |
| <i>OsSDR4</i>        | Os07g0691600 | Entry              |
| <i>OsAAO3;1</i>      | Os07g0281700 | Entry              |
| <i>OsAAO3;2</i>      | Os07g0282300 | Entry              |
| <i>OsAAO3;3</i>      | Os07g0164900 | Entry              |
| <i>OsAAO3;4</i>      | Os10g0168100 | Entry              |
| <i>OsAAO3;5</i>      | Os06g0790700 | No entry           |
| <i>OsAAO3;6</i>      | Os06g0790900 | No entry           |
| <i>OsABA3</i>        | Os06g0670000 | Entry              |
| <i>OsABA8OX1</i>     | Os02g0703600 | Entry              |
| <i>OsABA8OX2</i>     | Os08g0472800 | Entry              |
| <i>OsABA8OX3</i>     | Os09g0457100 | Entry              |

### JA

| gene name       | OsID         | probe on 44K array |
|-----------------|--------------|--------------------|
| <i>OsDAD1;1</i> | Os11g0146600 | No entry           |
| <i>OsDAD1;2</i> | Os08g0143600 | Entry              |
| <i>OsDAD1;3</i> | Os02g0653900 | Entry              |
| <i>OsDAD1;4</i> | Os10g0562200 | Entry              |
| <i>OsPLA1</i>   | Os07g0520900 | Entry              |
| <i>OsLOX2;1</i> | Os08g0508800 | Entry              |
| <i>OsLOX2;2</i> | Os12g0559200 | Entry              |
| <i>OsLOX2;3</i> | Os08g0509100 | Entry              |
| <i>OsLOX2;4</i> | Os02g0194700 | Entry              |
| <i>OsLOX2;5</i> | Os03g0179900 | Entry              |
| <i>OsAOS1</i>   | Os03g0225900 | Entry              |
| <i>OsAOS2</i>   | Os03g0757000 | Entry              |
| <i>OsAOS3*</i>  | Os02g0218700 | Entry              |
| <i>OsAOS4*</i>  | Os02g0218800 | Entry              |
| <i>OsAOC</i>    | Os03g0438100 | Entry              |
| <i>OsOPR7</i>   | Os08g0459600 | Entry              |
| <i>OsOPCL1</i>  | Os03g0132000 | Entry              |
| <i>OsACX</i>    | Os06g0103500 | Entry              |
| <i>OsACX3</i>   | Os06g0354500 | Entry              |
| <i>OsAIM1</i>   | Os02g0274100 | Entry              |
| <i>OsMPF</i>    | Os01g0348600 | Entry              |
| <i>OsMPF2</i>   | Os05g0155000 | Entry              |
| <i>OsKAT</i>    | Os02g0817700 | Entry              |
| <i>OsKAT2</i>   | Os10g0457600 | Entry              |
| <i>OsJAR1;1</i> | Os11g0186500 | No entry           |
| <i>OsJAR1;2</i> | Os05g0586200 | Entry              |
| <i>OsJAR1;3</i> | Os01g0221100 | Entry              |
| <i>OsJMT1</i>   | Os01g0701700 | Entry              |
| <i>OsJMT2</i>   | Os06g0329900 | Entry              |
| <i>OsJMT3</i>   | Os06g0314600 | Entry              |
| <i>OsJMT4</i>   | Os06g0323100 | Entry              |
| <i>OsJMT5</i>   | Os05g0102000 | Entry              |
| <i>OsJMT6</i>   | Os06g0315000 | No entry           |

In addition to the list described in Hirano et al (2008), asterisks indicate genes included in this study.

Hirano K, Aya K, Hobo T, Sakakibara H, Kojima M, Shim RA, Hasegawa Y, Ueguchi-Tanaka, M, Matsuoka M.  
 Comprehensive transcriptome analysis of phytohormone biosynthesis and signaling genes in microspore/pollen and tapetum of rice. *Plant Cell Physiol.* 2008; 49; 1425-1450.
